# Supplementary material
Source: publisher figshare collection journal article supplement (https://becaris.figshare.com/articles/dataset/_/28608533)
Supplement: Supplementary file 1 [file 1]

Supplemental Figure 1A. Standardized Mean Differences Between Patient Cohorts Before and After Weighting: Colorectal Surgeries
